# Supplementary material
Source: PubMed Central journal article supplement (PMC4094026)
Supplement: Supp_Data.pdf [file Supp_Data.pdf]

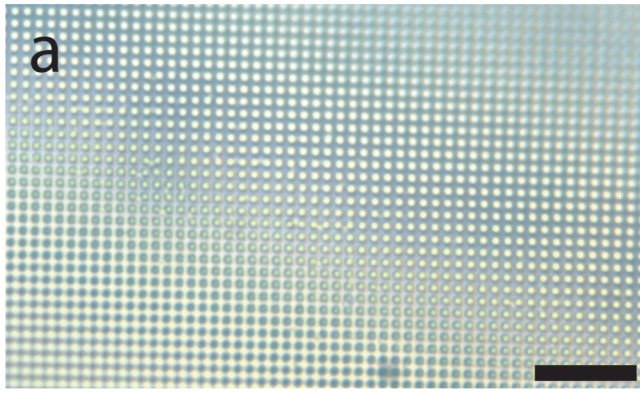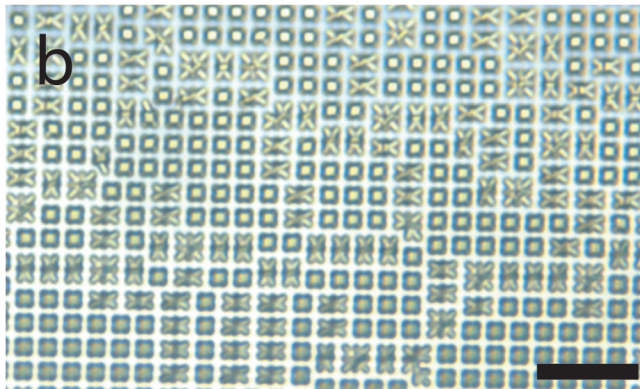

**SUPPLEMENTAL FIG. S1.** Effect of hydration on ordering of features in nanofabricated elastomeric poly(ester amide) substrates. **(a)** Pillars maintain long range order in hydrated nanofabricated 2DAH-1G elastomeric poly(ester amide) substrates. **(b)** However, the pillars collapse on each other and form clusters upon dehydration of the substrate. This is likely due to attraction from van der Waals forces. Scale bars represent 10  $\mu\text{m}$ .

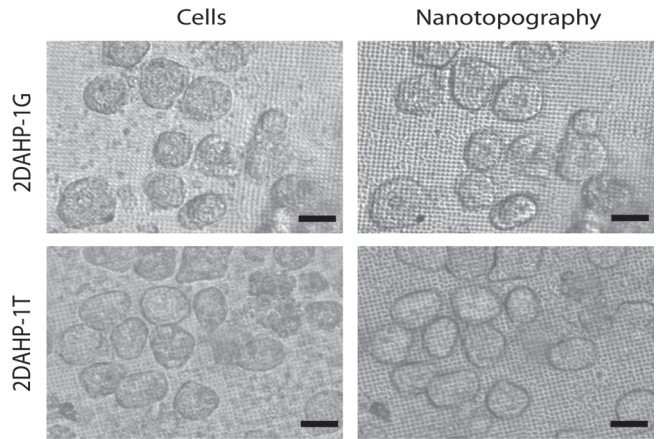

**SUPPLEMENTAL FIG. S2.** Arrangement of nanotopographical features of substrates during hepatocyte adhesion. The features of nanotopographic substrates remained ordered as they appeared in the hydrated condition. Further, the hepatocyte appeared to have no impact on the spacing of the features. This suggests that the adhesive forces of the cells are not significant enough to deflect the posts an appreciable amount. Scale bars represent 10  $\mu\text{m}$ .
